# Supplementary material for: Immunodominance and functional alterations of tumor‐associated antigen‐specific CD8+ T‐cell responses in hepatocellular carcinoma
Source: PubMed Central journal article supplement (PMC4139003; doi:10.1002/hep.26731), 2014-02-20
Supplement: hep-59-1415-s7.pdf [file hep-59-1415-s7.pdf]

## Supplementary Online Material

### Materials and Methods

**Peptides and tetramers.** Comprehensive peptide sets spanning AFP, GPC-3, MAGE-A1 and NY-ESO-1 (18mers overlapping by ten residues; Supplementary Table 1) and individual epitopic peptides were synthesized by Genaxxon (Ulm, Germany), dissolved in DMSO, diluted in RPMI and used at a final concentration of 10 µg/ml. Biotinylated peptide-HLA class I-monomers for the epitopes NY-ESO-1<sub>157-165</sub> (SLLMWITQC/HLA-A\*02:01), NY-ESO-1<sub>145-153</sub> (LQLSISSCL/HLA-A\*02:01) and MAGE-A1<sub>96-104</sub> (SLFRAVITK/HLA-A\*03:01) were generated by refolding the respective heavy chains with β<sub>2</sub>-microglobulin in the presence of the respective peptides and subsequently tetramerized with allophycocyanin-conjugated streptavidin (ProZyme, Hayward, CA). Control allophycocyanin-labeled pentamers for the epitopes cytomegalovirus (CMV) pp65<sub>495-503</sub> (NLVPMVATV/HLA-A\*02:01), Epstein-Barr virus (EBV) BMLF-1<sub>280-288</sub> (GLCTLVAML/HLA-A\*02:01) and influenza virus M1<sub>58-66</sub> (GILGFVFTL/HLA-A\*02:01) were obtained from ProImmune (Oxford, UK).

**Cell isolation.** Peripheral blood mononuclear cells (PBMC) were isolated by density gradient centrifugation with Pancoll separation medium (PAN Laboratories, Eidenbach, Germany) and washed two times with phosphate-buffered saline (PBS). Intrahepatic lymphocytes (IHL) and tumor-infiltrating lymphocytes (TIL) were obtained by gently grinding liver and tumor material through a sterile 70 nm cell strainer (BD Biosciences, Franklin Lakes, NJ). Cells isolated from biopsies were used directly, cells from surgical resections were subjected to density gradient centrifugation prior to use.

***CD8<sup>+</sup> T-cell selection and culture.*** CD8<sup>+</sup> T-cells were isolated by incubating 4x10<sup>6</sup> PBMC with anti-CD8 monoclonal antibody (mAb)-coated magnetic beads and subsequently separating the cells using a magnetic holder (both Life Technologies, Darmstadt, Germany). Purity of CD8<sup>+</sup> T-cells was >95% as determined by flow cytometry. CD8<sup>+</sup> T-cells were plated into one well of a 24-well plate (Greiner Bio One, Frickenhausen, Germany) in 2 ml complete medium (RPMI with 10% fetal bovine serum, 1% penicillin/streptomycin and 1.5% 1 M HEPES; all Life technologies) together with 2x10<sup>6</sup> irradiated autologous PBMC and supplemented with 100 U/ml recombinant human IL-2 (Hoffmann-La Roche, Basel, Switzerland) and 0.04 µg/ml anti-CD3 mAb (Immunotech, Marseilles, France). Twice a week for three weeks, cells were split and supplemented with fresh medium containing IL-2 at a final concentration of 100 U/ml. Experiments were performed no earlier than four days after the last addition of IL-2.

***Generation of epitope-specific CD8<sup>+</sup> T-cell lines.*** CD8<sup>+</sup> T-cell lines were generated by plating 4x10<sup>6</sup> PBMC in 1 ml complete medium into one well of a 24-well plate in the presence of 10 µg/ml of the respective peptide and 0.5 µg/ml anti-CD28 mAb (BD). 1 ml complete medium containing recombinant human IL-2 at a final concentration of 20 U/ml was added on days 4 and 11. On day 7, the supernatant was removed and the cells were resuspended in 1 ml complete medium containing 2x10<sup>6</sup> irradiated autologous PBMC and 10 µg/ml of the respective peptide. In some experiments 10 µg/ml anti-PD-L1 mAb (eBioscience, San Diego, CA) or a combination of 10 ng/ml IL-7 (R&D Systems, Minneapolis, MN) and 100 pg/ml IL-12 (PeproTech, Rocky Hill, CT) was added at initiation of cultures. Experiments were performed on day 14 of culture.

**Depletion of regulatory T-cells ( $T_{reg}$ ).** PBMC were labeled with anti-CD25 magnetic beads and CD25<sup>+</sup> cells depleted using a magnetic holder, as described above for CD8<sup>+</sup> T-cell isolation. Epitope-specific CD8<sup>+</sup> T-cell lines were then generated as described above.

**Tetramer-staining.**  $1 \times 10^6$  cells were incubated in one well of a 96-well V-bottom plate (Greiner Bio One) with the respective tetramer in PBS containing 1% fetal bovine serum at 37 °C for 15 min. Subsequently, cells were washed, blocked with pure mouse immunoglobulin G1 (BD), and then surface-stained with phycoerythrin (PE)-labeled anti-CD8 mAb and 7-amino-actinomycin D (ViaProbe; both BD). Finally, cells were fixated in PBS/2% paraformaldehyde. In some experiments, PE-Cy7-labeled anti-PD-1 and PE-labeled anti-Tim-3 mAbs (both BioLegend, San Diego, CA) were used additionally for surface-staining. In this case, allophycocyanin-H7-labeled anti-CD8 mAb (BD) was used.

**Intracellular cytokine staining.** For intracellular cytokine staining, cells were incubated for 5 h at 37 °C in one well of a 96-well V-bottom plate in the presence of 50 U/ml recombinant human IL-2 and 1 µg/ml Brefeldin A (BD). Unstimulated wells received no further additions. For peptide-stimulation, 10 µg/ml of the respective peptide (pools) were added. A combination of 10 ng/ml phorbol-12-myristate-13-acetate and 0.2 µg/ml ionomycin (both Sigma-Aldrich, Seelze, Germany) was used as positive control. Following incubation, cells were surface-stained with PE-labeled anti-CD8 mAb and ViaProbe and permeabilized using Cytotfix/Cytoperm (all BD). Subsequently, the cells were washed with Perm/Wash buffer (BD), stained intracellularly with fluorescein-isothiocyanate-labeled anti-interferon-γ mAb (BD) and fixated with PBS/2% paraformaldehyde. Samples were stored over night at 4 °C prior to flow cytometric acquisition.

**Regulatory T-cell ( $T_{reg}$ ) staining.** PBMC, IHL or TIL were surface stained with peridinin-chlorophyll-protein-labeled anti-CD4 (BD) and allophycocyanin-labeled anti-CD25 (eBioscience) mAbs. Cells were then permeabilized with the FoxP3/Transcription-Factor-Staining-Buffer-Set (eBioscience) and stained with AlexaFluor488-labeled anti-FoxP3 mAb (eBioscience) according to the manufacturer's instructions. Stained samples were analyzed by flow cytometry on the same day after fixation with PBS/2% paraformaldehyde.

**Perforin staining.** Antigen-specifically expanded cells were stained with tetramer as described above and surface stained with allophycocyanin-H7-labeled anti-CD25, V500-labeled anti-CD8 mAbs and ViaProbe (all BD). Cells were then permeabilized as described for  $T_{reg}$  staining and stained with fluorescein-isothiocyanate-labeled anti-Granzyme B, biotin-labeled anti-FasL (both BD) and PE-labeled anti-Perforin (Diacclone, Besançon, France) mAbs according to the manufacturers' instructions. Subsequently, cells were stained with Streptavidin-eFluor450 (eBioscience). Stained samples were analyzed by flow cytometry on the same day after fixation with PBS/2% paraformaldehyde.

**Flow cytometry.** Samples were acquired using a BD FACSCanto II flow cytometer (BD). Data were analyzed using FlowJo software (Treestar, Inc., Ashland, OR). Dead cells (ViaProbe<sup>+</sup>) were excluded from analyses.

**Data analysis.** Flow cytometry data were analyzed using FlowJo software (Treestar, Inc., Ashland, OR). Screening was performed by stimulating antigen-unspecifically expanded CD8<sup>+</sup> T-cells with pools of five peptides each. The pools that triggered production of interferon- $\gamma$  (IFN- $\gamma$ ) were broken down to individual peptides which were then evaluated in triplicate after subtraction of unstimulated background values. Response frequencies were calculated as the mean of the %IFN- $\gamma$ <sup>+</sup>/CD8<sup>+</sup> cells of each triplicate. Responses with a minimum of 0.01% were considered positive. For tetramer stainings, gates were set individually for each patient according to tetramer-unstained control wells.

### TAA recognized

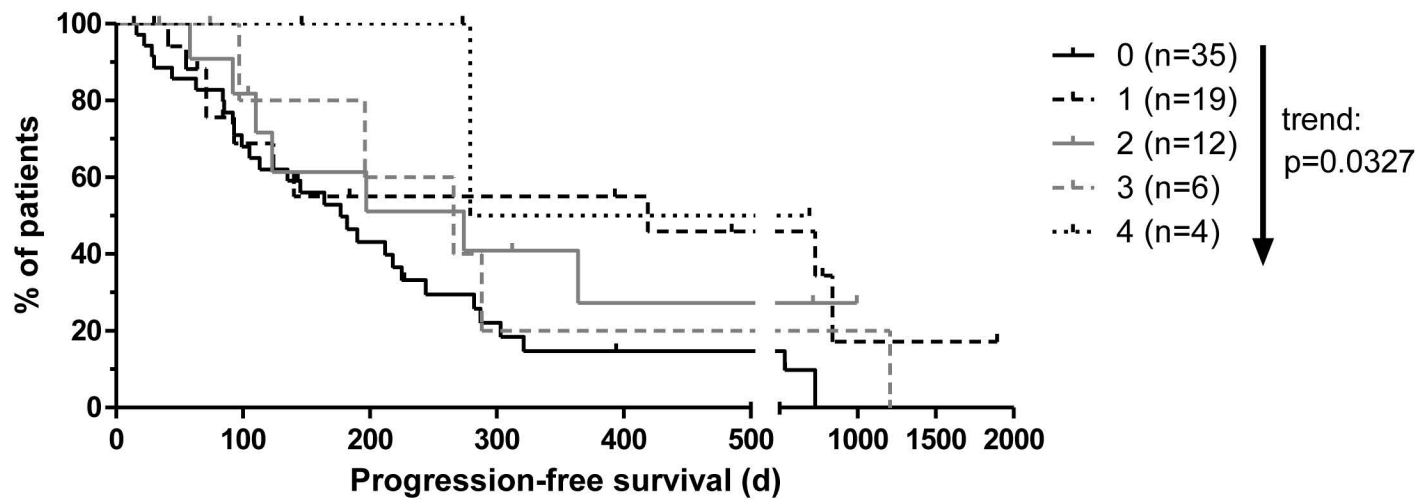

**A**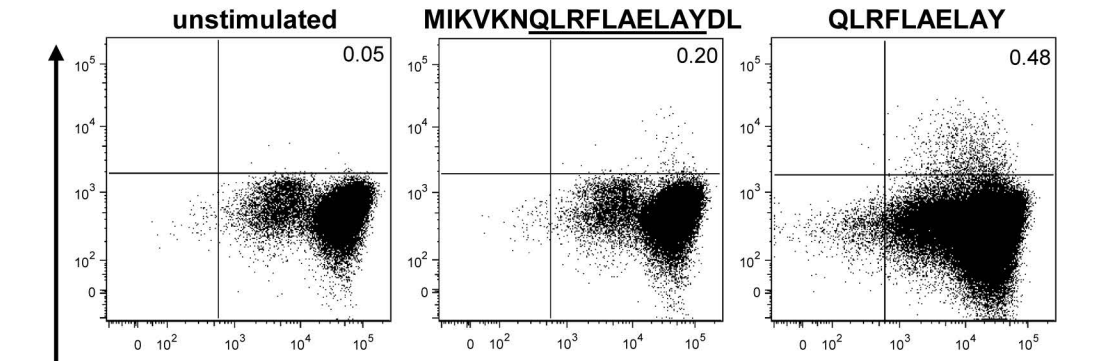**GPC-3 65****B**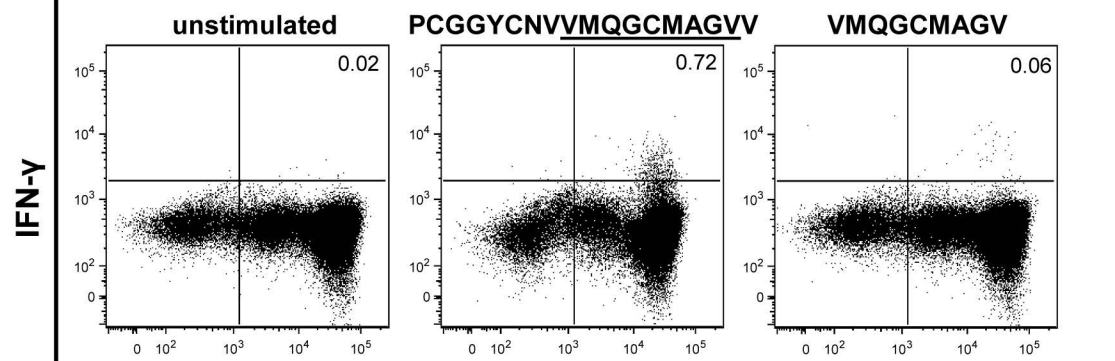**GPC-3 36****C**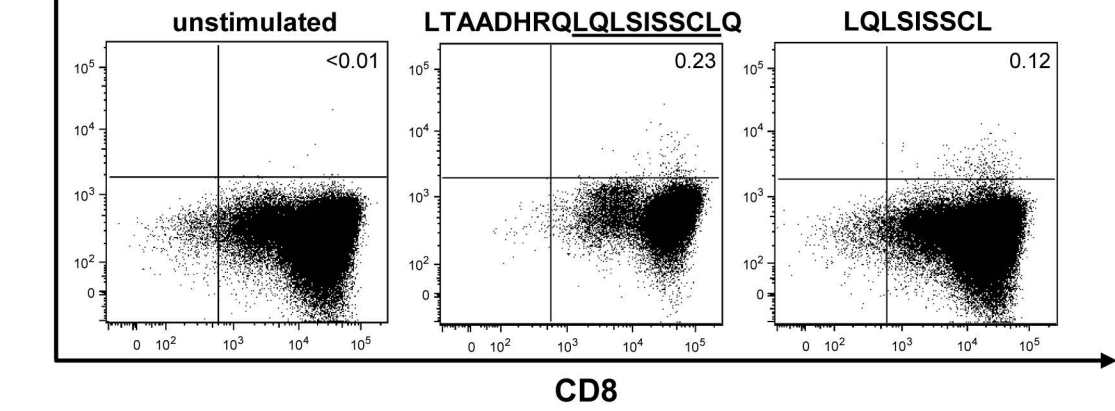**NY-ESO-1 18**

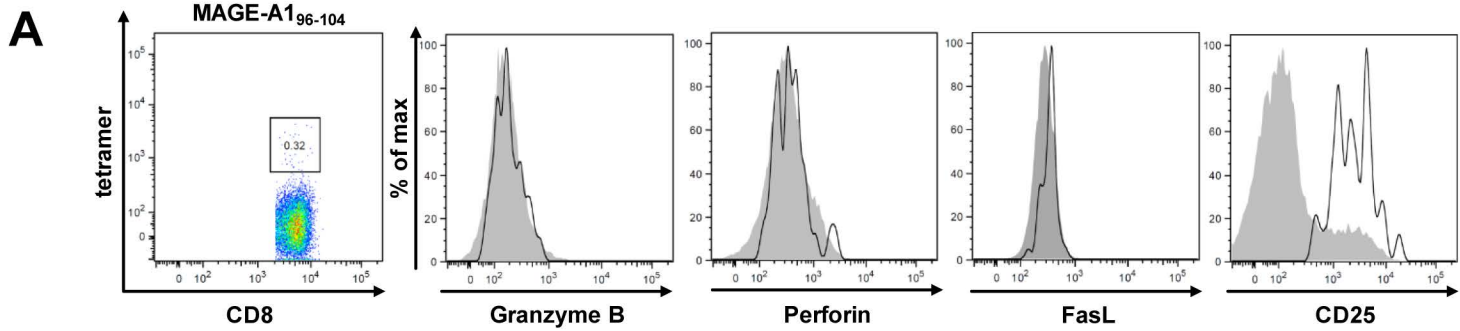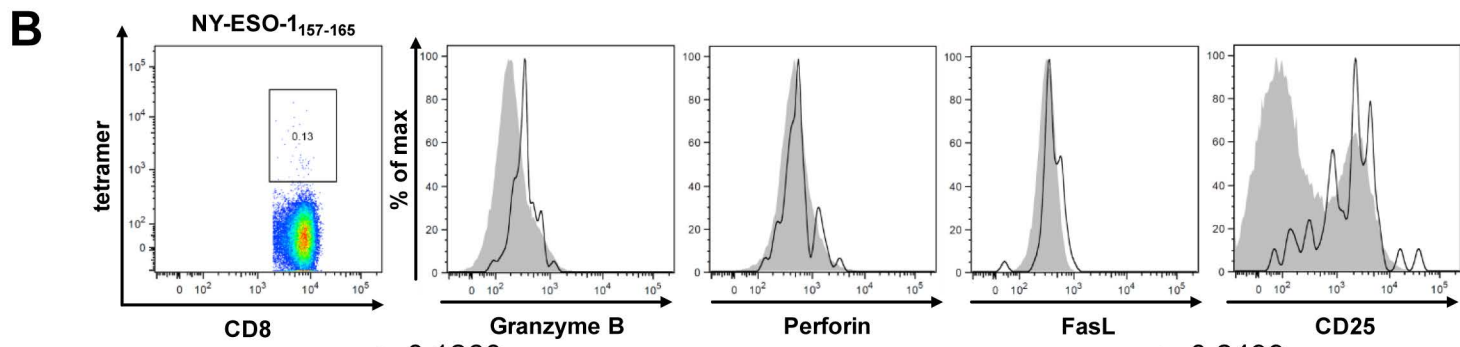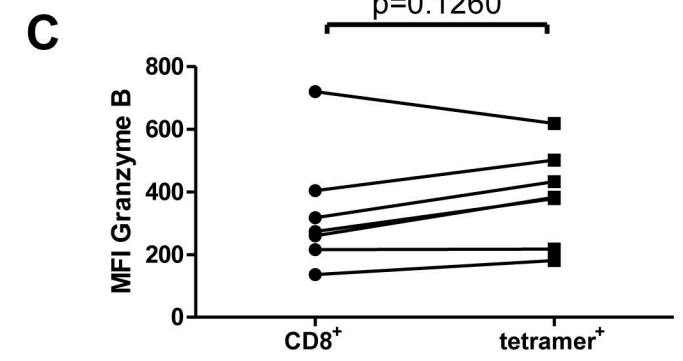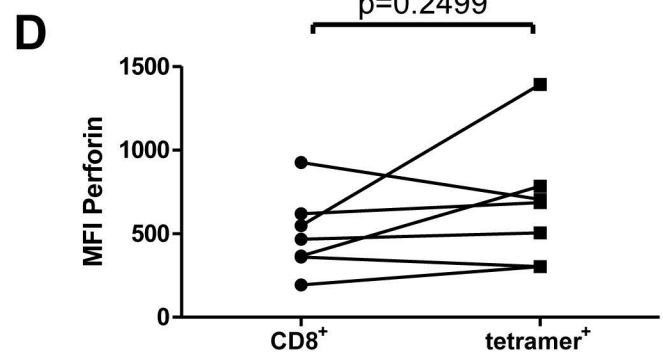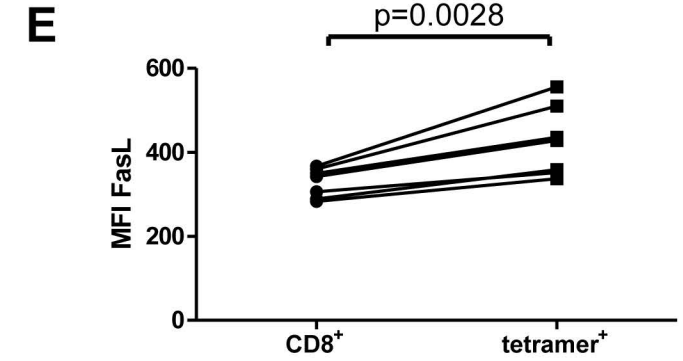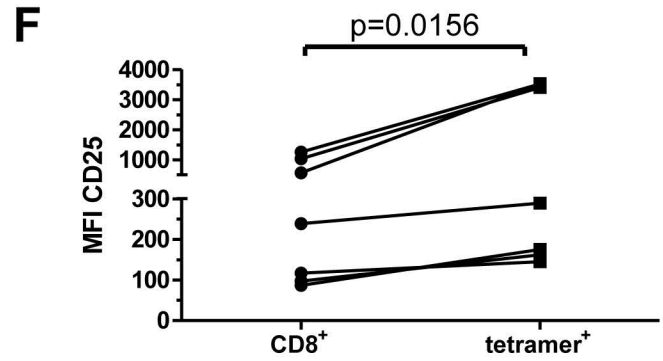

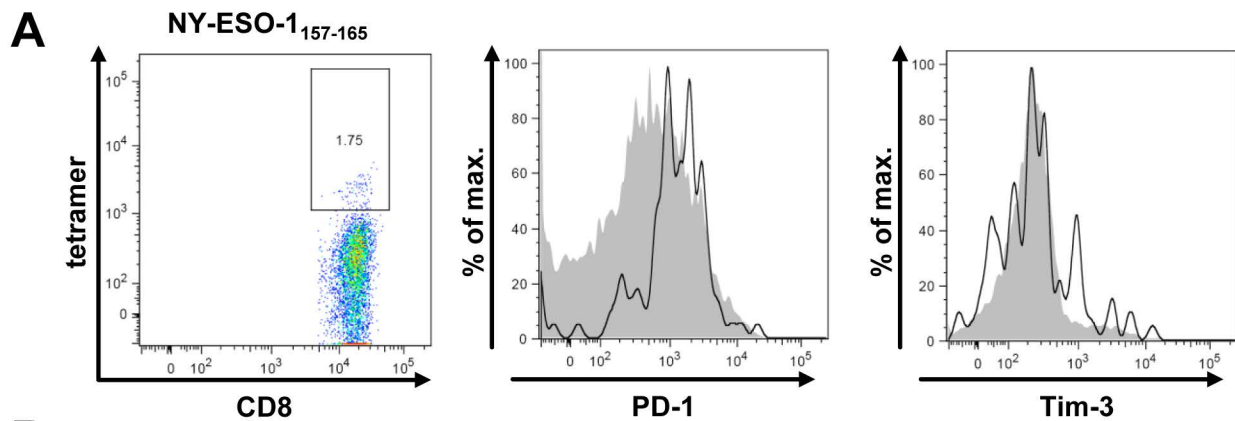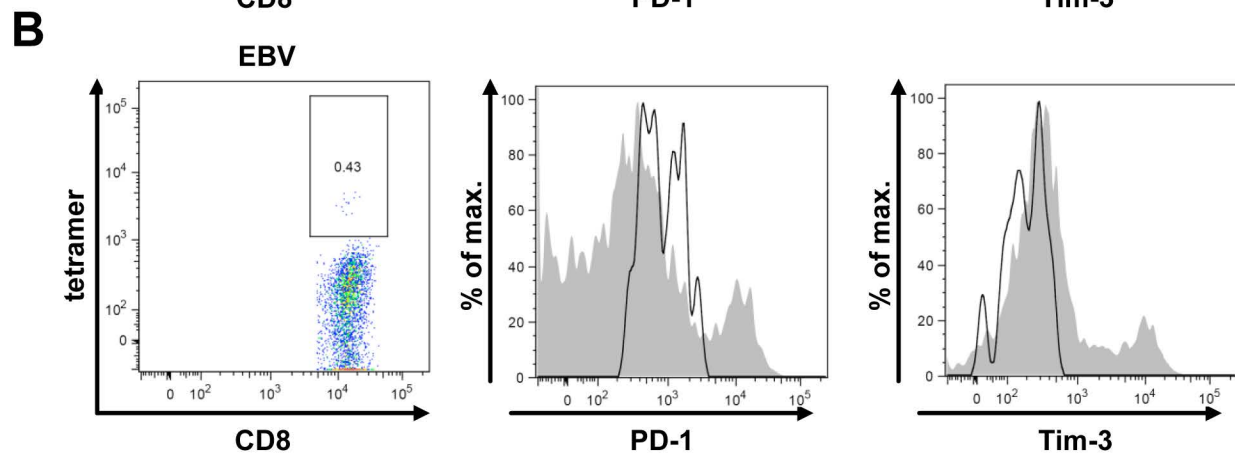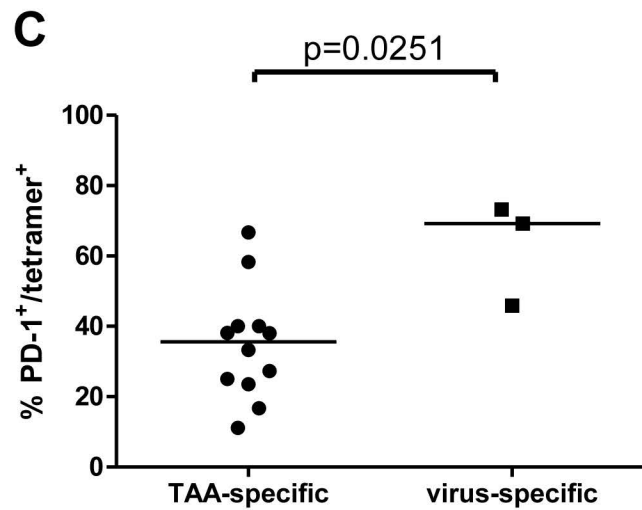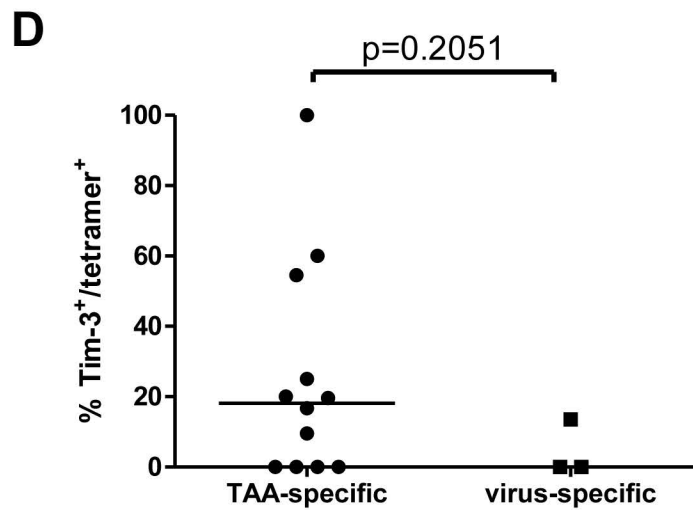





### Supplementary Table 1 List of overlapping peptides.

The sequences of the overlapping peptides for each of the four TAAs and their position within the protein sequence are shown. aa: amino acid

| AFP     |                     |            |          |
|---------|---------------------|------------|----------|
| peptide | sequence            | start (aa) | end (aa) |
| 1       | MKWVESIFLIFLLNFTES  | 1          | 18       |
| 2       | LIFLLNFTESRTLHRNEY  | 9          | 26       |
| 3       | ESRTLHRNEYGIASILDS  | 17         | 34       |
| 4       | EYGIASILDSYQCTAEIS  | 25         | 42       |
| 5       | DSYQCTAEISLADLATIF  | 33         | 50       |
| 6       | ISLADLATIFFAQFVQEA  | 41         | 58       |
| 7       | IFFAQFVQEATYKEVSKM  | 49         | 66       |
| 8       | EATYKEVSKMVKDALTAI  | 57         | 74       |
| 9       | KMVKDALTAIEKPTGDEQ  | 65         | 82       |
| 10      | AIEKPTGDEQSSGCLENQ  | 73         | 90       |
| 11      | EQSSGCLENQLPAFLEEL  | 81         | 98       |
| 12      | NQLPAFLEELCHEKEILE  | 89         | 106      |
| 13      | ELCHEKEILEKYGHSDCC  | 97         | 114      |
| 14      | LEKYGHSDCCSQSEGRH   | 105        | 122      |
| 15      | CCSQSEGRHNCFLAHKK   | 113        | 130      |
| 16      | RHNCFLAHKKPTPASIPL  | 121        | 138      |
| 17      | KKPTPASIPLFQVPEPVT  | 129        | 146      |
| 18      | PLFQVPEPVTSCWAYEED  | 137        | 154      |
| 19      | VTSCEAYEEDRETFMNKF  | 145        | 162      |
| 20      | EDRETFMNKFIYEIARRH  | 153        | 170      |
| 21      | KFIYEIARRHPFLYPTI   | 161        | 178      |
| 22      | RHPFLYPTILLWAARYD   | 169        | 186      |
| 23      | TILLWAARYDKIIPSCCK  | 177        | 194      |
| 24      | YDKIIPSCCKAENAVECF  | 185        | 202      |
| 25      | CKAENAVECFQTKAATVT  | 193        | 210      |
| 26      | CFQTKAATVTKELRESSL  | 201        | 218      |
| 27      | VTKELRESSLLNQHACAV  | 209        | 226      |
| 28      | LLNQHACAVMKNFGTRT   | 217        | 234      |
| 29      | AVMKNFGTRTFQAITVTK  | 225        | 242      |
| 30      | RTFQAITVTKLSQKF'TKV | 233        | 250      |
| 31      | TKLSQKF'TKVNFTEIQKL | 241        | 258      |
| 32      | KVNFTEIQKLVLDAHVH   | 249        | 266      |
| 33      | KLVLDAHVHEHCCRGDV   | 257        | 274      |
| 34      | VHEHCCRGDVLDCLDQGE  | 265        | 282      |
| 35      | DVLDCLDQGEKIMSYICS  | 273        | 290      |
| 36      | GEKIMSYICSQQDTLSNK  | 281        | 298      |
| 37      | CSQQDTLSNKITECCKLT  | 289        | 306      |
| 38      | NKITECCKLTTLERGQCI  | 297        | 314      |
| 39      | LTTLERGQCIIHAENDEK  | 305        | 322      |
| 40      | CIIHAENDEKPEGLSPNL  | 313        | 330      |
| 41      | EKPEGLSPNLNRFLGDRD  | 321        | 338      |
| 42      | NLNRFLGDRDFNQFSSGE  | 329        | 346      |
| 43      | RDFNQFSSGEKNIFLASF  | 337        | 354      |
| 44      | GEKNIFLASFVHEYSRRH  | 345        | 362      |

|    |                     |     |     |
|----|---------------------|-----|-----|
| 45 | SFVHEYSRRHPQLAVSVI  | 353 | 370 |
| 46 | RHPQLAVSVILRVAKGYQ  | 361 | 378 |
| 47 | VILRVAKGYQELLEKCFQ  | 369 | 386 |
| 48 | YQELLEKCFQTENPLECQ  | 377 | 394 |
| 49 | FQTENPLECQDKGEEELQ  | 385 | 402 |
| 50 | CQDKGEEELQKYIQESQA  | 393 | 410 |
| 51 | LQKYIQESQALAKRSCGL  | 401 | 418 |
| 52 | QALAKRSCGLFQKLGEYY  | 409 | 426 |
| 53 | GLFQKLGEYYLQNAFLVA  | 417 | 434 |
| 54 | YYLQNAFLVAYTKKAPQL  | 425 | 442 |
| 55 | VAYTKKAPQLTSSELMAI  | 433 | 450 |
| 56 | QLTSSELMAITRKMAATA  | 441 | 458 |
| 57 | AITRKMAATAATCCQLSE  | 449 | 466 |
| 58 | TAATCCQLSEDKLLACGE  | 457 | 474 |
| 59 | SEDKLLACGEGAADIIIG  | 465 | 482 |
| 60 | GEGAADIIIGHLCIRHEM  | 473 | 490 |
| 61 | IGHLCIRHEMTPVNPVG   | 481 | 498 |
| 62 | EMTPVNPVGQCCTSSYA   | 489 | 506 |
| 63 | VGQCCTSSYANRRPCFSS  | 497 | 514 |
| 64 | YANRRPCFSSLVVDETYV  | 505 | 522 |
| 65 | SSLVVDETYVPPAFSDDK  | 513 | 530 |
| 66 | YVPPAFSDDKFIFHKDLC  | 521 | 538 |
| 67 | DKFIFHKDLCQAQGVALQ  | 529 | 546 |
| 68 | LCQAQGVALQTMKQEFLLI | 537 | 554 |
| 69 | LQTMKQEFLLINLVKQKPQ | 545 | 562 |
| 70 | LINLVKQKPQITEEQLEA  | 553 | 570 |
| 71 | PQITEEQLEAVIADFSGL  | 561 | 578 |
| 72 | EAVIADFSGLLEKCCQGQ  | 569 | 586 |
| 73 | GLLEKCCQGQEQEVCFAE  | 577 | 594 |
| 74 | GQEQEVCFAEEGQKLSIK  | 585 | 602 |
| 75 | FAEEGQKLISKTRAALGV  | 593 | 610 |

**GPC-3**

| <b>peptide</b> | <b>sequence</b>      | <b>start (aa)</b> | <b>end (aa)</b> |
|----------------|----------------------|-------------------|-----------------|
| 1              | MAGTVRTACLVVAMLLSL   | 1                 | 18              |
| 2              | CLVVAMLLSLDFPGQAQP   | 9                 | 26              |
| 3              | SLDFPGQAQPPPPPPDAT   | 17                | 34              |
| 4              | QPPPPPPDATCHQVRSFF   | 25                | 42              |
| 5              | ATCHQVRSFFQRLQPGLK   | 33                | 50              |
| 6              | FFQRLQPGLKWVPETPVP   | 41                | 58              |
| 7              | LKWVPETPVPGSDLQVCL   | 49                | 66              |
| 8              | VPGSDLQVCLPKGPTCCS   | 57                | 74              |
| 9              | CLPKGPTCCSRKMEEKYQ   | 65                | 82              |
| 10             | CSRKMEEKYQLTARLNME   | 73                | 90              |
| 11             | YQLTARLNMEQLLQSASM   | 81                | 98              |
| 12             | MEQLLQSASMEKFLIIQ    | 89                | 106             |
| 13             | SMELKFLIIQNAAVFQEA   | 97                | 114             |
| 14             | IQNAAVFQEAFAFEIVVRHA | 105               | 122             |
| 15             | EAFEIVVRHAKNYTNAMF   | 113               | 130             |
| 16             | HAKNYTNAMFKNNYPSLT   | 121               | 138             |
| 17             | MFKNNYPSLTPQAFEFVG   | 129               | 146             |
| 18             | LTPQAFEFVGEFFTDVSL   | 137               | 154             |
| 19             | VGEFFTDVSLYILGSDIN   | 145               | 162             |
| 20             | SLYILGSDINVDDMVNEL   | 153               | 170             |
| 21             | INVDDMVNELFDSLFPVI   | 161               | 178             |
| 22             | ELFDSLFPVIYTQLMNPG   | 169               | 186             |
| 23             | VIYTQLMNPGLPDSALDI   | 177               | 194             |
| 24             | PGLPDSALDINECLRGAR   | 185               | 202             |
| 25             | DINECLRGARRDLKVFGN   | 193               | 210             |
| 26             | ARRDLKVFGNFPKLIMTQ   | 201               | 218             |
| 27             | GNFPKLIMTQVSKSLQVT   | 209               | 226             |
| 28             | TQVSKSLQVTRIFLQALN   | 217               | 234             |
| 29             | VTRIFLQALNLGIEVINT   | 225               | 242             |
| 30             | LNLGIEVINTTDHLKFSK   | 233               | 250             |
| 31             | NTTDHLKFSKDCGRMLTR   | 241               | 258             |
| 32             | SKDCGRMLTRMWYCSYCQ   | 249               | 266             |
| 33             | TRMWYCSYCQGLMMVKPC   | 257               | 274             |
| 34             | CQGLMMVKPCGGYCNVVM   | 265               | 282             |
| 35             | PCGGYCNVVMQGC MAGVV  | 273               | 290             |
| 36             | VMQGC MAGVVEIDKYWRE  | 281               | 298             |
| 37             | VVEIDKYWREYILSLEEL   | 289               | 306             |
| 38             | REYILSLEELVNGMYRIY   | 297               | 314             |
| 39             | ELVNGMYRIYDMENVLLG   | 305               | 322             |
| 40             | IYDMENVLLGLFSTIHDS   | 313               | 330             |
| 41             | LGLFSTIHDSIQYVQKNA   | 321               | 338             |
| 42             | DSIQYVQKNAGKLTTTIG   | 329               | 346             |
| 43             | NAGKLTTTIGKLCAHSQQ   | 337               | 354             |
| 44             | IGKLCAHSQQRQYRSAYY   | 345               | 362             |
| 45             | QQRQYRSAYYPEDLFIDK   | 353               | 370             |
| 46             | YYPEDLFIDKKVLKVAHV   | 361               | 378             |
| 47             | DKKVLKVAHVEHEETLSS   | 369               | 386             |
| 48             | HVEHEETLSSRRRELIQK   | 377               | 394             |
| 49             | SSRRRELIQKLSFISFY    | 385               | 402             |

|    |                     |     |     |
|----|---------------------|-----|-----|
| 50 | QKLKSFISFYALPGYIC   | 393 | 410 |
| 51 | FYSALPGYICSHSPVAEN  | 401 | 418 |
| 52 | ICSHSPVAENDTLCWNGQ  | 409 | 426 |
| 53 | ENDTLCWNGQELVERYSQ  | 417 | 434 |
| 54 | GQELVERYSQKAARNGMK  | 425 | 442 |
| 55 | SQKAARNGMKNQFNLHEL  | 433 | 450 |
| 56 | MKNQFNLHELKMKGPEPV  | 441 | 458 |
| 57 | ELKMKGPEPVVSQIIDKL  | 449 | 466 |
| 58 | PVVSQIIDKLGKHNQLLR  | 457 | 474 |
| 59 | KLKHINQLLRTMSMPKGR  | 465 | 482 |
| 60 | LRTMSMPKGRVLDKNLDE  | 473 | 490 |
| 61 | GRVLDKNLDEEGFESGDC  | 481 | 498 |
| 62 | DEEGFESGDCGDEDECI   | 489 | 506 |
| 63 | DCGDEDECIIGSGDGMI   | 497 | 514 |
| 64 | CIGSGDGMIKVKNQLRF   | 505 | 522 |
| 65 | MIKVKNQLRFLAELAYDL  | 513 | 530 |
| 66 | RFLAELAYDLVDVDDAPGN | 521 | 538 |
| 67 | DLVDVDDAPGNSQQATPKD | 529 | 546 |
| 68 | GNSQQATPKDNEISTFHN  | 537 | 554 |
| 69 | KDNEISTFHNLGNVHSPL  | 545 | 562 |
| 70 | HNLGNVHSPLKLLTSMIAI | 553 | 570 |
| 71 | PLKLLTSMIAISVVCFFFL | 561 | 578 |
| 72 | AISVVCFFFLVHMAGTVR  | 569 | 6   |
| 73 | FLVHMAGTVRTACLVVAM  | 577 | 14  |

**MAGE-A1**

| <b>peptide</b> | <b>sequence</b>     | <b>start (aa)</b> | <b>end (aa)</b> |
|----------------|---------------------|-------------------|-----------------|
| 1              | MSLEQRSLHCKPEEALEA  | 1                 | 18              |
| 2              | HCKPEEALQAQQEALGLV  | 9                 | 26              |
| 3              | EAQQEALGLVQVQAATSS  | 17                | 34              |
| 4              | LVCVQAATSSSSPLVLGT  | 25                | 42              |
| 5              | SSSSPLVLGTLEEVPTAG  | 33                | 50              |
| 6              | GTLEEVPTAGSTDPPQSP  | 41                | 58              |
| 7              | AGSTDPPQSPQGASAFPT  | 49                | 66              |
| 8              | SPQGASAFPTTINFTRQR  | 57                | 74              |
| 9              | PTTINFTRQRQPSEGSSS  | 65                | 82              |
| 10             | QRQPSEGSSSREEEGPST  | 73                | 90              |
| 11             | SSREEEGPSTSCILESLF  | 81                | 98              |
| 12             | STSCILESLFRAVITKKV  | 89                | 106             |
| 13             | LFRAVITKKVADLVGFLL  | 97                | 114             |
| 14             | KVADLVGFLLLKYRAREP  | 105               | 122             |
| 15             | LLLKYRAREPVTKAEMLE  | 113               | 130             |
| 16             | EPVTKAEMLESVIKKNYKH | 121               | 138             |
| 17             | LESVIKKNYKHCFFEIFGK | 129               | 146             |
| 18             | KHCFFEIFGKASESLQLV  | 137               | 154             |
| 19             | GKASESLQLVFGIDVKEA  | 145               | 162             |
| 20             | LVFGIDVKEADPTGHSYV  | 153               | 170             |
| 21             | EADPTGHSYVLVTCLGLS  | 161               | 178             |
| 22             | YVLVTCLGLSYDGLLGDN  | 169               | 186             |
| 23             | LSYDGLLGDNQIMPKTGF  | 177               | 194             |
| 24             | DNQIMPKTGFLLIIVLVMA | 185               | 202             |
| 25             | GFLIIVLVMAAMEGGHAPE | 193               | 210             |
| 26             | MAMEGGHAPEEEIWEELS  | 201               | 218             |
| 27             | PEEEIWEELSVMEVYDGR  | 209               | 226             |
| 28             | LSVMEVYDGREHSAYGEP  | 217               | 234             |
| 29             | GREHSAYGEPKLLTQDL   | 225               | 242             |
| 30             | EPRKLLTQDLVQEKYLEY  | 233               | 250             |
| 31             | DLVQEKYLEYRQVPDSDP  | 241               | 258             |
| 32             | EYRQVPDSDPARYEFLWG  | 249               | 266             |
| 33             | DPARYEFLWGPRALAETS  | 257               | 274             |
| 34             | WGPRALAETSYVKVLEYV  | 265               | 282             |
| 35             | TSYVKVLEYVIKVSARVR  | 273               | 290             |
| 36             | YVIKVSARVRFFFPSLRE  | 281               | 298             |
| 37             | VRFFFPSLREAALREEEE  | 289               | 306             |
| 38             | REAALREEEEGVMSLEQR  | 297               | 6               |
| 39             | EEGVMSLEQRSLHCKPEE  | 305               | 14              |

**NY-ESO-1**

| <b>peptide</b> | <b>sequence</b>      | <b>start (aa)</b> | <b>end (aa)</b> |
|----------------|----------------------|-------------------|-----------------|
| 1              | MQAEGRGTGGSTGDADGP   | 1                 | 18              |
| 2              | GGSTGDADGPGGPGIPDG   | 9                 | 26              |
| 3              | GPGGPGIPDGPGGNAGGP   | 17                | 34              |
| 4              | DGPGGNAGGPGEAGATGG   | 25                | 42              |
| 5              | GPGEAGATGGRGPRGAGA   | 33                | 50              |
| 6              | GGRGPRGAGAARASGPGG   | 41                | 58              |
| 7              | GAARASGPGGGAPRGPHG   | 49                | 66              |
| 8              | GGGAPRGPHGGAASGLNG   | 57                | 74              |
| 9              | HGGAASGLNGCCRCGARG   | 65                | 82              |
| 10             | NGCCRCGARGPESRLLEF   | 73                | 90              |
| 11             | RGPE SRLLEFY LAMPFAT | 81                | 98              |
| 12             | EFY LAMPFATPME AELAR | 89                | 106             |
| 13             | ATPME AELARRSLA QDAP | 97                | 114             |
| 14             | ARRSLA QDAPPLP VPGVL | 105               | 122             |
| 15             | APPLP VPGVLLKEFTVSG  | 113               | 130             |
| 16             | VLLKEFTVSGNILTIRLT   | 121               | 138             |
| 17             | SGNILTIRLTAA DHRQLQ  | 129               | 146             |
| 18             | LTAADHRQLQLS ISSCLQ  | 137               | 154             |
| 19             | LQLS ISSCLQQLS LLMWI | 145               | 162             |
| 20             | LQQLS LLMWITQCFLPVF  | 153               | 170             |
| 21             | WITQCFLPVFLAQPPSGQ   | 161               | 178             |
| 22             | VFLAQPPSGQRRMQA EGR  | 169               | 6               |
| 23             | GQRRMQA EGRGTGGSTGD  | 177               | 14              |

## Supplementary Table 2 Detailed patient characteristics

Detailed information on the patients included in the study. For patient 18 no peripheral blood mononuclear cells (PBMC) were available, thus yielding a total of 95 patients for analyses based on PBMC. Patients that were not eligible for analysis of progression-free survival (PFS) because of lacking follow-up examinations are indicated by the sign not available (n/a) in the PFS section. The treatment at the start of each PFS interval is indicated as well as the treatment the patients had received prior to inclusion into the study. For multivariate survival analyses, patients with incomplete datasets were excluded (marked in grey). IHL: intrahepatic lymphocytes. TIL: tumor-infiltrating lymphocytes. M: male. F: female. y: years. LC: liver cirrhosis. HCV: hepatitis C virus. NASH: non-alcoholic steatohepatitis. HBV: hepatitis B virus. AFP:  $\alpha$ -fetoprotein. BCLC: Barcelona clinic liver cancer stage. RFTA: radio-frequency thermal ablation. TACE: trans-arterial chemo-embolization. PEI: percutaneous ethanol-injection. d: days. cens.: censored. resp.: number of responses. TAA: number of tumor-associated antigens recognized.

| #  | samples  | sex | age [y] | LC  | etiology    | AFP [ng/ml] | BCLC | prior treatment    | treatment PFS | PFS [d] | cens. | resp. | TAA |
|----|----------|-----|---------|-----|-------------|-------------|------|--------------------|---------------|---------|-------|-------|-----|
| 1  | PBMC     | M   | 75      | yes | ethanol     | 4.6         | A    | TACE               | TACE          | 196     | no    | 4     | 3   |
| 2  | PBMC     | F   | 60      | yes | ethanol     | 2.3         | C    | none               | n/a           | n/a     | n/a   | 3     | 2   |
| 3  | PBMC     | M   | 77      | yes | HCV         | 20.0        | A    | RFTA+<br>TACE      | TACE          | 244     | no    | 0     | 0   |
| 4  | PBMC     | M   | 52      | no  | NASH        | 97.9        | C    | resection+<br>TACE | TACE          | 99      | no    | 0     | 0   |
| 5  | PBMC     | M   | 68      | yes | ethanol     | 60,500      | C    | none               | TACE          | 93      | no    | 1     | 1   |
| 6  | PBMC     | M   | 71      | yes | ethanol     | 3.8         | 0    | TACE               | TACE          | 364     | no    | 3     | 2   |
| 7  | PBMC+TIL | M   | 84      | yes | ethanol     | 6.0         | D    | none               | n/a           | n/a     | n/a   | 3     | 2   |
| 8  | PBMC     | M   | 79      | no  | HBV         | 3.4         | B    | TACE               | TACE          | 1,894   | yes   | 1     | 1   |
| 9  | PBMC+IHL | F   | 57      | no  | cryptogenic | 2.7         | B    | resection+<br>TACE | TACE          | 71      | no    | 1     | 1   |
| 10 | PBMC     | M   | 73      | yes | NASH        | 2.4         | A    | RFTA               | TACE          | 840     | no    | 1     | 1   |
| 11 | PBMC     | M   | 69      | yes | ethanol     | 6,999       | B    | none               | n/a           | n/a     | n/a   | 0     | 0   |
| 12 | PBMC     | M   | 78      | yes | HCV         | 4.6         | A    | PEI                | RFTA          | 177     | no    | 0     | 0   |



|    |                  |   |    |     |             |        |   |               |               |       |     |   |   |
|----|------------------|---|----|-----|-------------|--------|---|---------------|---------------|-------|-----|---|---|
| 13 | PBMC             | M | 68 | yes | ethanol     | 2,166  | A | RFTA+<br>TACE | TACE          | 44    | yes | 0 | 0 |
| 14 | PBMC+TIL         | M | 74 | yes | NASH        | 223.8  | B | TACE          | TACE          | 104   | yes | 2 | 2 |
| 15 | PBMC             | M | 62 | yes | ethanol     | 2,850  | A | TACE          | TACE          | 58    | no  | 2 | 2 |
| 16 | PBMC             | M | 75 | yes | HCV         | 5.8    | B | none          | TACE          | 164   | no  | 0 | 0 |
| 17 | PBMC             | M | 79 | no  | cryptogenic | 2.2    | A | resection     | RFTA+<br>TACE | 729   | no  | 0 | 0 |
| 18 | IHL+TIL          | M | 56 | yes | ethanol     | 7.6    | A | none          | resection     | 715   | yes | 3 | 2 |
| 19 | PBMC+TIL         | M | 55 | yes | ethanol     | 37.4   | B | none          | TACE          | 225   | no  | 0 | 0 |
| 20 | PBMC+TIL         | M | 57 | yes | HBV         | 2.3    | C | none          | TACE          | 34    | yes | 4 | 2 |
| 21 | PBMC             | M | 71 | yes | cryptogenic | 1.9    | 0 | RFTA+<br>TACE | TACE          | 184   | yes | 2 | 1 |
| 22 | PBMC             | M | 51 | yes | ethanol     | 5.4    | A | TACE          | n/a           | n/a   | n/a | 1 | 1 |
| 23 | PBMC             | M | 72 | yes | ethanol     | 8.9    | 0 | none          | resection     | 1,207 | no  | 3 | 3 |
| 24 | PBMC+IHL         | M | 53 | yes | HCV         | 60,500 | C | none          | sorafenib     | 85    | no  | 0 | 0 |
| 25 | PBMC             | M | 62 | yes | ethanol     | 1,051  | C | none          | resection     | 140   | no  | 3 | 1 |
| 26 | PBMC             | M | 82 | yes | HCV         | 6.4    | C | none          | n/a           | n/a   | n/a | 0 | 0 |
| 27 | PBMC             | M | 69 | yes | ethanol     | 889.0  | C | TACE          | TACE          | 124   | no  | 1 | 1 |
| 28 | PBMC+TIL         | M | 71 | no  | HCV         | n/a    | 0 | none          | resection     | n/a   | n/a | 1 | 1 |
| 29 | PBMC             | F | 79 | yes | HCV         | 9.2    | A | none          | TACE          | 218   | no  | 0 | 0 |
| 30 | PBMC<br>+IHL+TIL | F | 59 | yes | HCV         | 441.2  | 0 | TACE          | resection     | 692   | yes | 6 | 4 |
| 31 | PBMC             | F | 50 | no  | porphyria   | 5.2    | A | none          | resection     | 535   | yes | 0 | 0 |
| 32 | PBMC             | M | 67 | no  | ethanol     | 2.2    | 0 | none          | resection     | 995   | yes | 2 | 2 |
| 33 | PBMC             | F | 66 | yes | ethanol     | 6.9    | B | resection     | RFTA          | 177   | yes | 0 | 0 |
| 34 | PBMC+TIL         | M | 73 | yes | cryptogenic | 7.1    | B | none          | TACE          | 14    | yes | 1 | 1 |
| 35 | PBMC+TIL         | M | 56 | yes | HBV         | 119.3  | C | none          | TACE          | 22    | no  | 0 | 0 |
| 36 | PBMC             | M | 73 | yes | HCV         | 65.0   | 0 | TACE          | TACE          | 288   | no  | 3 | 3 |
| 37 | PBMC<br>+IHL+TIL | M | 62 | yes | cryptogenic | 10.1   | B | TACE          | resection     | 776   | yes | 2 | 1 |

|           |                  |   |    |     |             |       |   |                    |           |     |     |   |   |
|-----------|------------------|---|----|-----|-------------|-------|---|--------------------|-----------|-----|-----|---|---|
| <b>38</b> | PBMC<br>+IHL+TIL | M | 68 | yes | ethanol     | n/a   | B | n/a                | resection | 30  | yes | 1 | 1 |
| <b>39</b> | PBMC             | M | 58 | yes | cryptogenic | 3.7   | A | none               | n/a       | n/a | n/a | 2 | 2 |
| <b>40</b> | PBMC             | M | 62 | no  | HBV         | 16.7  | A | TACE               | TACE      | 729 | no  | 1 | 1 |
| <b>41</b> | PBMC             | M | 66 | no  | NASH        | 503.1 | B | resection+<br>TACE | TACE      | 41  | no  | 1 | 1 |
| <b>42</b> | PBMC             | M | 63 | yes | HCV         | 34.6  | B | none               | TACE      | 190 | no  | 0 | 0 |
| <b>43</b> | PBMC             | M | 79 | yes | ethanol     | 3.7   | C | RFTA+<br>TACE      | TACE      | 282 | no  | 0 | 0 |
| <b>44</b> | PBMC+TIL         | M | 77 | yes | ethanol     | 61.7  | C | none               | TACE      | 197 | no  | 5 | 2 |
| <b>45</b> | PBMC             | F | 82 | yes | HBV         | 9.8   | 0 | TACE               | TACE      | 273 | yes | 7 | 4 |
| <b>46</b> | PBMC+TIL         | M | 60 | yes | HBV         | 2.2   | A | none               | TACE      | 71  | no  | 2 | 1 |
| <b>47</b> | PBMC             | M | 68 | yes | ethanol     | 23.2  | 0 | resection+<br>TACE | TACE      | 266 | no  | 4 | 3 |
| <b>48</b> | PBMC<br>+IHL+TIL | F | 73 | no  | cryptogenic | 1,860 | 0 | none               | resection | 274 | no  | 4 | 2 |
| <b>49</b> | PBMC             | F | 62 | yes | AIH         | 598.8 | B | none               | TACE      | 419 | no  | 1 | 1 |
| <b>50</b> | PBMC             | M | 80 | no  | NASH        | 3.4   | A | none               | resection | 146 | yes | 6 | 4 |
| <b>51</b> | PBMC<br>+IHL+TIL | M | 61 | no  | cryptogenic | 50.7  | A | none               | n/a       | n/a | n/a | 0 | 0 |
| <b>52</b> | PBMC             | M | 69 | yes | ethanol     | 7.1   | B | resection+<br>TACE | TACE      | 145 | no  | 0 | 0 |
| <b>53</b> | PBMC             | M | 69 | yes | ethanol     | 553.1 | B | resection+<br>TACE | TACE      | 30  | no  | 0 | 0 |
| <b>54</b> | PBMC             | M | 65 | yes | ethanol     | 135.6 | C | n/a                | n/a       | n/a | n/a | 0 | 0 |
| <b>55</b> | PBMC             | M | 71 | yes | ethanol     | 5.2   | B | none               | TACE      | 74  | yes | 3 | 3 |
| <b>56</b> | PBMC             | M | 62 | yes | NASH        | 7.9   | A | resection          | TACE      | 534 | no  | 0 | 0 |
| <b>57</b> | PBMC             | M | 66 | yes | ethanol     | 285.0 | A | none               | TACE      | 92  | no  | 3 | 2 |
| <b>58</b> | PBMC             | M | 64 | no  | HCV         | 80.1  | A | none               | TACE      | 321 | no  | 0 | 0 |
| <b>59</b> | PBMC             | M | 63 | yes | ethanol     | 56.4  | D | none               | n/a       | n/a | n/a | 1 | 1 |
| <b>60</b> | PBMC             | M | 66 | yes | HCV         | 106.2 | B | none               | TACE      | 135 | no  | 0 | 0 |

|    |          |   |    |     |                      |        |   |                    |           |     |     |   |   |
|----|----------|---|----|-----|----------------------|--------|---|--------------------|-----------|-----|-----|---|---|
| 61 | PBMC+IHL | M | 82 | no  | cryptogenic          | 3.3    | 0 | none               | resection | 312 | yes | 2 | 2 |
| 62 | PBMC     | M | 73 | yes | HCV                  | 24.5   | A | none               | TACE      | 485 | yes | 1 | 1 |
| 63 | PBMC     | M | 81 | no  | NASH                 | 3.8    | B | none               | TACE      | 394 | yes | 0 | 0 |
| 64 | PBMC     | F | 45 | yes | HBV                  | 12,100 | D | none               | n/a       | n/a | n/a | 2 | 2 |
| 65 | PBMC     | M | 55 | yes | HCV                  | 26,537 | C | none               | n/a       | n/a | n/a | 0 | 0 |
| 66 | PBMC     | M | 73 | yes | hemo-<br>chromatosis | 5.1    | B | TACE               | resection | 212 | no  | 0 | 0 |
| 67 | PBMC+TIL | M | 49 | yes | HBV                  | 8.6    | B | none               | resection | 84  | no  | 0 | 0 |
| 68 | PBMC     | M | 82 | no  | HCV                  | 4.0    | B | none               | TACE      | 92  | no  | 0 | 0 |
| 69 | PBMC     | M | 66 | yes | ethanol              | 254.4  | A | TACE               | resection | 93  | no  | 0 | 0 |
| 70 | PBMC     | M | 70 | yes | ethanol              | 3.1    | B | none               | TACE      | 97  | no  | 3 | 3 |
| 71 | PBMC     | M | 59 | yes | ethanol              | 60,500 | D | none               | n/a       | n/a | n/a | 0 | 0 |
| 72 | PBMC     | M | 55 | no  | HCV                  | 8.7    | B | n/a                | n/a       | n/a | n/a | 0 | 0 |
| 73 | PBMC+TIL | M | 57 | no  | cryptogenic          | 6,549  | C | none               | sorafenib | 105 | no  | 0 | 0 |
| 74 | PBMC+IHL | M | 85 | no  | HCV                  | 1.4    | A | none               | TACE      | 110 | no  | 2 | 2 |
| 75 | PBMC     | M | 76 | n/a | ethanol              | 6.0    | A | n/a                | resection | 64  | yes | 1 | 1 |
| 76 | PBMC     | M | 58 | yes | HBV                  | 54.1   | A | none               | resection | 182 | no  | 0 | 0 |
| 77 | PBMC     | M | 77 | yes | cryptogenic          | 12.9   | B | TACE               | TACE      | 28  | no  | 0 | 0 |
| 78 | PBMC     | M | 64 | yes | HCV                  | 30.3   | B | resection          | TACE      | 123 | no  | 2 | 2 |
| 79 | PBMC     | M | 58 | yes | ethanol              | 375.2  | A | none               | TACE      | 393 | yes | 1 | 1 |
| 80 | PBMC     | M | 81 | yes | HCV                  | 162.1  | C | TACE+<br>sorafenib | TACE      | 44  | no  | 0 | 0 |
| 81 | PBMC     | F | 58 | yes | HCV                  | 3.9    | 0 | none               | n/a       | n/a | n/a | 0 | 0 |
| 82 | PBMC     | M | 76 | no  | cryptogenic          | 4.0    | B | none               | n/a       | n/a | n/a | 0 | 0 |
| 83 | PBMC+TIL | M | 59 | yes | ethanol              | 4.6    | B | resection          | resection | 287 | yes | 0 | 0 |
| 84 | PBMC     | F | 72 | n/a | NASH                 | 52.4   | B | none               | resection | 303 | yes | 0 | 0 |
| 85 | PBMC     | M | 58 | yes | HCV                  | 8.7    | B | none               | TACE      | 113 | no  | 0 | 0 |
| 86 | PBMC     | M | 76 | no  | cryptogenic          | n/a    | B | none               | n/a       | n/a | n/a | 1 | 1 |
| 87 | PBMC     | M | 83 | yes | cryptogenic          | 55.4   | B | TACE               | TACE      | 279 | no  | 8 | 4 |
| 88 | PBMC     | F | 63 | yes | PBC                  | 4,703  | B | TACE               | TACE      | 84  | yes | 1 | 1 |

|           |          |     |     |     |             |        |     |           |           |     |     |   |   |
|-----------|----------|-----|-----|-----|-------------|--------|-----|-----------|-----------|-----|-----|---|---|
| <b>89</b> | PBMC     | M   | 75  | no  | ethanol     | 7.0    | A   | none      | resection | 227 | yes | 0 | 0 |
| <b>90</b> | PBMC     | M   | 72  | yes | cryptogenic | 60,500 | A   | resection | TACE      | 55  | no  | 1 | 1 |
| <b>91</b> | PBMC     | M   | 73  | yes | cryptogenic | 41.2   | B   | none      | TACE      | 63  | no  | 0 | 0 |
| <b>92</b> | PBMC     | M   | 73  | no  | NASH        | 2.9    | B   | none      | resection | 143 | no  | 0 | 0 |
| <b>93</b> | PBMC     | M   | 55  | yes | ethanol     | 7,430  | B   | none      | n/a       | n/a | n/a | 0 | 0 |
| <b>94</b> | PBMC+IHL | n/a | n/a | no  | HCV         | n/a    | n/a | n/a       | n/a       | n/a | n/a | 1 | 1 |
| <b>95</b> | PBMC     | M   | 55  | yes | HCV         | 155.0  | C   | none      | TACE      | 16  | no  | 0 | 0 |
| <b>96</b> | PBMC     | F   | 73  | yes | cryptogenic | 5.9    | 0   | none      | n/a       | n/a | n/a | 2 | 2 |

**Supplementary Table 3 Known and newly fine-mapped CD8<sup>+</sup> T-cell epitopes found in the overlapping peptides recognized in the patient cohort.**

Left: overlapping peptides and previously described epitopes contained within them. Right: frequent HLA-alleles in patients with responses to overlapping peptides and newly fine mapped epitopes. Epitope candidates were tested on antigen-unspecifically expanded CD8<sup>+</sup> T-cells of HLA-matched patients. nd: not done.

| peptide         | # of patients | previously described epitope | position | restricting HLA-allele<br>(% of patients) | enriched HLA-alleles<br>(% of patients)          | newly fine-mapped epitope | position | responses (patients tested) |
|-----------------|---------------|------------------------------|----------|-------------------------------------------|--------------------------------------------------|---------------------------|----------|-----------------------------|
| <b>AFP 1</b>    | 1             | MKWVESIFL                    | 1-9      | A*02 (100)                                | -                                                | -                         | -        | -                           |
| <b>AFP 6</b>    | 17            | -                            | -        | -                                         | A*02 (41)<br>A*03 (41)<br>B*07 (24)<br>B*18 (24) | -                         | -        | -                           |
| <b>AFP 52</b>   | 5             | RSCGLFQKL                    | 414-422  | A*24 (20)                                 | A*03 (40)<br>B*08 (40)                           | -                         | -        | -                           |
| <b>AFP 68</b>   | 4             | GVALQTMKQ                    | 542-550  | A*02 (75)                                 | A*03 (50)<br>B*07 (50)                           | -                         | -        | -                           |
| <b>GPC-3 36</b> | 13            | -                            | -        | -                                         | A*02 (31)<br>A*03 (38)<br>A*25 (15)<br>B*44 (38) | VMQGCMAGV                 | 281-289  | 1 (37)                      |
| <b>GPC-3 37</b> | 1             | EYILSLEEL                    | 298-306  | A*24 (0)                                  | -                                                | -                         | -        | -                           |
| <b>GPC-3 65</b> | 13            | FLAELAYDL                    | 522-530  | A*02 (31)                                 | A*03 (56)<br>B*44 (38)<br>B*51 (25)              | QLRFLAELAY                | 519-528  | 2 (18)                      |

|                    |    |             |         |            |           |           |         |         |
|--------------------|----|-------------|---------|------------|-----------|-----------|---------|---------|
| <b>MAGE-A1 12</b>  | 6  | SLFRAVITK   | 96-102  | A*03 (50)  | A*02 (50) | -         | -       | -       |
|                    |    | ESLFRVITK   | 95-102  | A*11 (0)   | B*07 (33) | -         | -       | -       |
|                    |    |             |         |            | B*08 (33) | -         | -       | -       |
|                    |    |             |         |            | B*44 (33) | -         | -       | -       |
| <b>MAGE-A1 13</b>  | 1  | ITKKVADLVGF | 102-112 | B*57 (0)   | -         | -         | -       | -       |
|                    |    | KVADLVGFLL  | 105-114 | A*02 (100) | -         | -         | -       | -       |
| <b>MAGE-A1 14</b>  | 8  | KVADLVGFLL  | 105-114 | A*02 (50)  | A*01 (38) | -         | -       | -       |
|                    |    |             |         |            | A*02 (38) | -         | -       | -       |
|                    |    |             |         |            | A*03 (50) | -         | -       | -       |
|                    |    |             |         |            | A*26 (25) | -         | -       | -       |
|                    |    |             |         |            | B*38 (25) | -         | -       | -       |
| <b>NY-ESO-1 11</b> | 1  | RLLEFYLAM   | 86-98   | A*02 (100) | -         | -         | -       | -       |
|                    |    | LEFYLAMPF   | 88-98   | B*18 (100) | -         | -         | -       | -       |
| <b>NY-ESO-1 12</b> | 1  | LAMPFATPM   | 92-100  | B*35 (0)   | -         | -         | -       | -       |
|                    |    |             |         | B*51 (0)   | -         | -         | -       | -       |
|                    |    |             |         | Cw*03 (nd) | -         | -         | -       | -       |
| <b>NY-ESO-1 18</b> | 6  | -           | -       | -          | A*02 (67) | LQLSISSCL | 145-153 | 10 (37) |
|                    |    |             |         |            | A*66 (33) | -         | -       | -       |
|                    |    |             |         |            | B*15 (50) | -         | -       | -       |
| <b>NY-ESO-1 20</b> | 12 | SLLMWITQC   | 157-165 | A*02 (58)  | A*03 (33) | -         | -       | -       |
|                    |    | SLLMWITQCF  | 157-166 | A*02 (58)  | B*07 (33) | -         | -       | -       |
|                    |    | LLMQITQCF   | 158-166 | A*02 (58)  | -         | -         | -       | -       |
|                    |    | ITQCFLPVF   | 162-170 | A*24 (0)   | -         | -         | -       | -       |
